# Supplementary material
Source: Springer Nature journal article supplement (https://www.springermedizin.de/resource/supplementary/12874_2008_301_MOESM2_ESM.pdf/9434194)

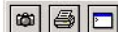

```

R D:\CARTER\Randomisation_allocation_training_area\Example_Allocation_Execution...
# Author      : BRC #
# Prog       : Example_Allocation_Execution_Code.R #
# Description : Example code how to run the allocation #
#####
# The below is the source code

area <- "D:\\CARTER\\randomisation_allocation_training_area"

#####
# The below is the source code#
#####

source(paste(area, "\\rcode\\randomisation.R", sep="\\"))
source(paste(area, "\\rcode\\randomisation 2.R", sep="\\"))

#####
# This is example code for block one allocation #

random.allocation(folder      = area,
                  covariates   = "prognostic.csv",
                  unit         = 24,
                  outfile      = "block one",
                  figure       = "blk1")

random.allocation.additional(folder      = area,
                             covariates = "prognostic.csv",
                             unit       = 22,
                             outfile    = "block two",
                             figure     = "blk2",
                             infile     = "block_one_allocation.csv")

```

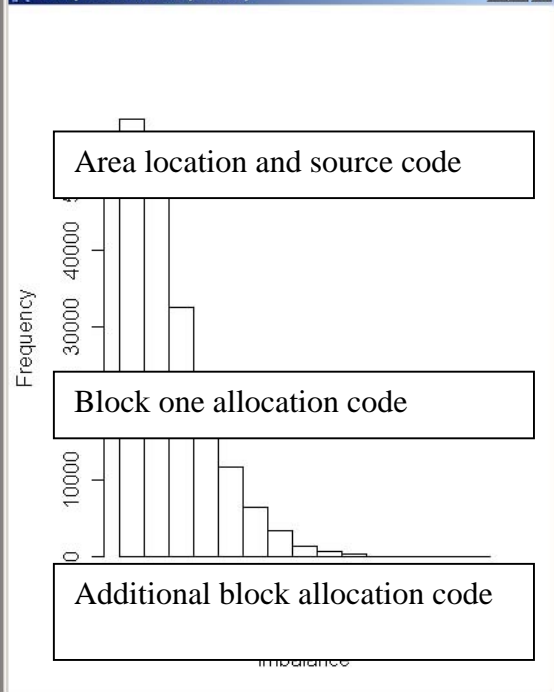

Supplement: MOESM2 [file 9434194]
